# Supplementary material for: Fishery Status and Rebuilding of Major Economic Fishes in the Largest Freshwater Lake in China Based on Limited Data
Source: MDPI journal article supplement (doi:10.3390/fishes7010047), 2022-02-15
Supplement: s1 [file s1]

**Table S1. The biological information of the nine fishes in the Poyang Lake.**

| Species                                | Feeding habits<br>[71,72] | Water column<br>position<br>[71,73] | Resilience<br>[73] | Egg types<br>[71,74,75] | Life-history<br>strategies<br>[76] | Age of first<br>sexual maturity<br>[71] | Spawning types<br>[71,77,78] | Parental<br>care<br>[71,72] |
|----------------------------------------|---------------------------|-------------------------------------|--------------------|-------------------------|------------------------------------|-----------------------------------------|------------------------------|-----------------------------|
| <i>Carassius auratus</i>               | omnivore                  | demersal                            | medium             | sticky                  | opportunistic                      | 1                                       | multiple-batch<br>spawning   | no                          |
| <i>Ctenopharyngodon<br/>idella</i>     | herbivore                 | pelagic                             | low                | drifting                | periodic                           | 3-4                                     | spawning once                | no                          |
| <i>Cyprinus carpio</i>                 | omnivore                  | demersal                            | medium             | sticky                  | periodic                           | 2                                       | multiple-batch<br>spawning   | no                          |
| <i>Hypophthalmichthys<br/>molitrix</i> | phytoplankton             | pelagic                             | medium             | drifting                | periodic                           | 3-4                                     | Spawning once                | no                          |
| <i>Hypophthalmichthys<br/>nobilis</i>  | zooplankton               | pelagic                             | medium             | drifting                | periodic                           | 4-5                                     | spawning once                | no                          |
| <i>Mylopharyngodon<br/>piceus</i>      | carnivore                 | demersal                            | low                | drifting                | periodic                           | 4-5                                     | spawning once                | no                          |
| <i>Silurus asotus</i>                  | carnivore                 | demersal                            | low                | sticky                  | periodic                           | 1                                       | multiple-batch<br>spawning   | no                          |
| <i>Siniperca chuatsi</i>               | carnivore                 | demersal                            | medium             | drifting                | periodic                           | 1-2                                     | multiple-batch<br>spawning   | no                          |
| <i>Tachysurus<br/>fulvidraco</i>       | carnivore                 | demersal                            | medium             | sticky                  | equilibrium                        | 2                                       | multiple-batch<br>spawning   | yes                         |
